# Supplementary material for: Comparative Safety and Efficacy of Combining Infliximab and Azathioprine Versus Infliximab Monotherapy in Achieving Clinical Remission for Inflammatory Bowel Disease: A Systematic Review and Meta-analysis
Source: Research Square preprint supplement (doi:10.21203/rs.3.rs-7135835/v1), 2025-08-08
Supplement: Supplementary file 1 [file 9c002127fd787581f58f02b5.docx]

**Appendix A.1 Search terms**

**Table S1. Continuation of table 1 included RCTs different time of outcome remission rates**

**Table S2. Detailed adverse events reported from included RCTs**

**Table S3. GRADE Assessment of evidence quality for CD and UC clinical outcomes**

**Table S4. Sensitivity analysis of included RCTs**

Figure S1. Risk of bias graph

Figure S2. Risk of bias summary

**Figure S3. Funnel plot assessment and egger’s regression test of publication bias**

Supplementary Appendix A.1

*Search terms*

(TS=(“Inflammatory Bowel Diseases”) OR AB=(Crohn's Disease OR Crohns Disease OR Crohn's Enteritis OR Regional Enteritis OR Ileocolitis OR Terminal Ileitis OR Regional Ileitides OR Regional Ileitis OR Granulomatous Enteritis OR Granulomatous Colitis OR Colitis Gravis OR Idiopathic Proctocolitis OR Inflammatory Bowel Disease, Ulcerative Colitis Type OR Ulcerative Colitis)) AND (TS=(“Infliximab”) OR AB=(Monoclonal Antibody cA2 OR MAb cA2 OR Remicade OR Inflectra OR Renflexis OR Infliximab dyyb OR Infliximab abda)) AND (TS=(“Azathioprine”) OR AB=(Azothioprine OR Imuran OR Immuran OR Imurel OR Azathioprine Sulfate OR Azathioprine Sodium OR Azathioprine Sodium Sal

**Table S1.** Continuation of table 1 included RCTs different time of outcome remission rates

| **Author, year** | **Study type;Country (number of centers)** | **Total no. of patients** | **Disease location** | **Prior Treatment** | **Active intervention Dosage** | **Maintenance remission outcomes** | **Timing of outcome** | **Intervention Group** | **Control Group** | **IBD type** | **Follow-up weeks** |
| --- | --- | --- | --- | --- | --- | --- | --- | --- | --- | --- | --- |
| SONIC (2010) | RCT;  multicentre; 15 | 338 | L1:108; L2:85; L3:137; L4:28 | Corticosteroids, 5-ASA | IFX i.v. 5mg/kg at wk 0,2,6 + AZA p.o. 2.5mg/kg/day | CDAI<150 | week 50 | 80/108  (74.07%) | 64/97  (65.98%) | CD | 50 |
| Wang et al., 2014 | RCT;  China; 1 | 70 | Not Reported | Corticosteroids, 5-ASA | IFX i.v. 5mg/kg at wk 0,2,6 + AZA p.o. 2.5mg/kg/day | CDAI<150 | week 26 | 20/35  (57.14%) | 15/35  (42.86%) | CD | 26 |
| Chen et al., 2016 | RCT;  China; 1 | 120 | L1:48; L2:15; L3:31; L4:16 | Corticosteroids, 5-ASA | IFX i.v. 5mg/kg at wk 0,2,6 + AZA p.o. 2.5mg/kg/day | CDAI<150 | week 26 | 34/60  (56.67%) | 25/60  (41.67%) | CD | 26 |

Abbreviations:*L1* ileal, *L2* colonic, *L3* ileocolonic, *L4* upper gastrointestinal tract, *IBD* inflammatory bowel disease, *CD* Crohn’s disease, *UC* ulcerative colitis, *IFX* infliximab, *AZA* azathioprine, *5-ASA* **5-Aminosalicylic Acid, *IS* immunosuppressant, *i.v.*  intravenous**, *p.o.* per os, *CDAI* Crohn’s disease activity index, *NR* not reported

**Table S2.** Detailed adverse events reported from included RCTs

| **Study** | **Abdominal pain** | **Anemia** | **Arthralgia** | **Headache** | **Nasopharyngitis** | **Nausea** | **Pyrexia** | **Upper Respiratory Tract infection** |
| --- | --- | --- | --- | --- | --- | --- | --- | --- |
| SONIC (2010) | I:10/108  C:12/97 | NR | I:5/108 C:10/97 | I:4/108  C:9/97 | I:9/108  C:6/97 | I:6/108 C:11/97 | I:5/108 C:6/97 | I:1/108  C:4/97 |
| UC SUCCESS (2014) | I:0/80  C:3/78 | I:1/80  C:3/78 | NR | I:4/80  C:4/78 | NR | I:7/80 C:1/78 | I:2.80  C:5/78 | I:0/80  C:1/78 |

Abbreviation: *NR* not reported, *I* intervention group (IFX + AZA combination therapy), *C* control group (IFX monotherapy)

**Table S3.** GRADE Assessment of evidence quality for CD and UC clinical outcomes

| **Outcome** | **Number of Studies** | **Risk of Bias** | **Inconsistency** | **Indirectness** | **Imprecision** | **Publication Bias** | **Overall Quality** |
| --- | --- | --- | --- | --- | --- | --- | --- |
| clinical remission  (CDAI<150) in CD | 5 studies  (1 mixed cohort) | not serious | not serious | not serious | not serious | undetected | ⨁⨁⨁⨁  (high) |
| clinical remission  Mayo Score≤2 in UC | 2 studies  (1 mixed cohort) | serious  (-1) | serious  (-1) | not serious | serious  (-1) | undetected | ⨁◯◯◯  (low) |

**Table S4.** Sensitivity analysis of included RCTs

| **Study** | **Estimate** | **[ 95% CI]** | |
| --- | --- | --- | --- |
| Chen et al., 2016 | 2.05 | 1.42 | 2.97 |
| Roblin et al., 2017 | 2.00 | 1.42 | 2.81 |
| SONIC (2010) | 2.29 | 1.54 | 3.40 |
| SPARE (2023) | 2.10 | 1.49 | 2.97 |
| UC SUCCESS (2014) | 1.92 | 1.32 | 2.79 |
| Wang et al., 2014 | 1.75 | 1.23 | 2.48 |
| Combined | 2.02 | 1.40 | 2.90 |

Figure S1. Risk of bias graph

**Figure S1 legend.** review authors' judgements about each risk of bias item presented as percentages across all included studies.

Figure S2. Risk of bias summary

**Figure S2 legend.** review authors' judgements about each risk of bias item

**Figure S3.** Funnel plot assessment and egger’s regression test of publication bias

| **Test** | **Intercept (b)** | **SE** | **Z-Value** | **P-Value** | **95% CI Lower** | **95% CI Upper** |
| --- | --- | --- | --- | --- | --- | --- |
| Egger's Regression | 0.613 | 0.64 | -0.085 | 0.932 | -0.676 | 1.903 |
